# Supplementary material for: Evaluation of caregiver-friendly workplace policy (CFWPs) interventions on the health of full-time caregiver employees (CEs): implementation and cost-benefit analysis
Source: Springer Nature journal article supplement (doi:10.1186/s12889-017-4722-9), 2017-09-20
Supplement: MOESM1 [file 15074042]

## **Additional File 1**

### Calculation for a Pre-Post Study Design

The formula used to calculate the required sample size for a pre-post study design is:

$$n=D[(Z_{\alpha}+Z_{\beta})^2*(p_1(1-p_1)+p_2(1-p_2))/(p_1-p_2)^2]$$

Where,

n = required minimum sample size

D = design effect

P1 = the estimated level of an indicator measured as a proportion at the time of the first survey

P2 = the expected level of the indicator either at some future date

Z<sub>α</sub> = the level of statistical significance that the observed change of size would not have occurred by chance

Z<sub>β</sub> = the statistical power

Based on the published research by Fast et al. (2013), the proportion of CEs who had ‘Excellent/very good’ self-access health (SAH) was 60%. We will use this as the proportion at the time of the first interview. Using standard parameters of: 95% level of significance, and; 80% power, and employing a one-tailed test (since we want to test whether the implementation of caregiver-friendly workplace policies (CFWP) intervention(s) improves SAH. Suppose an increase of 25% in the proportion of having ‘Excellent/very good’ SAH is to be measured at the second interview, after the CFWP intervention(s) implemented. In this case, p1=0.6 and p2=0.8; Z<sub>α</sub>=1.96 and Z<sub>β</sub>=0.84; D=2 because a cluster sampling design is chosen given the selected

employers. The use of a standard value of  $D=2.0$  should adequately compensate for the use of cluster sampling.

$$n = 2 [(1.645 + 0.840)^2 * ((.6)(.4) + (.85)(.15)) / (.85 - .6)^2]$$
$$= 2[6.175 * 0.3675 / 0.625] = 72.6$$

Given this, 73 participants are needed to evaluate the CFWP intervention(s). Given that we will use a cluster sampling strategy, an estimated 37 participants are needed per employer partner organization (this provides a total of 74 participants).

Table 1: Sample sizes required for selected combinations of P1 and detected changes

[95% significance level and 80% power, D=2(cluster sampling)]

| P1   | Change/difference to be detected (P2 - P1) |     |      |     |      |     |
|------|--------------------------------------------|-----|------|-----|------|-----|
|      | 0.05                                       | 0.1 | 0.15 | 0.2 | 0.25 | 0.3 |
| 0.10 | 1074                                       | 309 | 152  | 93  | 63   | 45  |
| 0.15 | 1420                                       | 389 | 185  | 110 | 73   | 51  |
| 0.20 | 1717                                       | 457 | 213  | 124 | 81   | 56  |
| 0.25 | 1964                                       | 513 | 235  | 134 | 86   | 60  |
| 0.30 | 2161                                       | 556 | 251  | 142 | 90   | 62  |
| 0.35 | 2309                                       | 587 | 262  | 147 | 92   | 62  |
| 0.40 | 2408                                       | 605 | 268  | 148 | 92   | 62  |
| 0.45 | 2458                                       | 611 | 268  | 147 | 90   | 60  |
| 0.50 | 2458                                       | 605 | 262  | 142 | 86   | 56  |
| 0.55 | 2408                                       | 587 | 251  | 134 | 81   | 51  |
| 0.60 | 2309                                       | 556 | 235  | 124 | 73   | 45  |
| 0.65 | 2161                                       | 513 | 213  | 110 | 63   | 38  |
| 0.70 | 1964                                       | 457 | 185  | 93  | 51   | 29  |
| 0.75 | 1717                                       | 389 | 152  | 73  | 37   | 19  |
| 0.80 | 1420                                       | 309 | 114  | 49  | 21   | 7   |
| 0.85 | 1074                                       | 216 | 70   | 23  | 3    |     |
| 0.90 | 679                                        | 111 | 21   |     |      |     |

Note: Sample sizes shown assume a design effect (D) of 2.0. Suppose it was desired to show a 10% increase of a health outcome, from 20% to 30%, initial level of the indicator, or P1, would then be 0.20 (see left hand column), and the sample size would be 457.
